# Supplementary material
Source: PubMed Central journal article supplement (PMC4187886)
Supplement: IAI.02336-14_zii999090881so1.pdf [file IAI.02336-14_zii999090881so1.pdf]

Table 1: Primers and probes used in this study.

| Oligos              | 5'Sequence 3'                          | Description       | origin     |
|---------------------|----------------------------------------|-------------------|------------|
| IBS-cd3284          | AAAAAAGCTTATAATTATCCTTAGGTAACAGT       | ClosTron          | This study |
| EBS2-cd3284         | TGAACGCAAGTTTCTAATTTTCGATTTTACCTCG     | ClosTron          | This study |
| EBS1d-cd3284        | CAGATTGTACAAATGTGGTGATAACAGATAA        | ClosTron          | This study |
| EBS universal       | CGAAATTAGAACTTGCGTTCAGTAAA             | ClosTron/Control  |            |
| oDB0067             | CTGAGCTCCTGCAGTAAAGGAGAAAATTTTAT       | Complementation   | This study |
| oDB0068             | TAGGATCCGGTTAGAAATTCACATTTATTGTT       | Complementation   | This study |
| oDB0121             | CCAGCTTTTTCTGCTGATGA                   | Control PCR/seq.  | This study |
| oDB0123             | GAAGTTCTACGCCGATAGTT                   | Control PCR/seq.  | This study |
| oDB0124             | AATACCTACAACAGATGGCG                   | Control PCR       | This study |
| NF_794              | CACCGACGAGCAAGGCAAGACCG                | Control PCR/ seq. | (1)        |
| NF_1323             | CTGGACTTCATGAAAACTAAAAAAAATATTG        | sequencing        | (1)        |
| oWKS-1177           | ATCTAGCTAGCGCCAGGAGAGTTGTTGATTC        | Control PCR       | This study |
| <i>rspJ</i> Forward | GATCACAAGTTTCAGGACCTG                  | qPCR              | (2)        |
| <i>rspJ</i> Reverse | GTCTTAGGTGTTGGATTAGC                   | qPCR              | (2)        |
| <i>tcdA</i> Forward | AATCCAATACAAGCCCTGTAG                  | qPCR              | (2)        |
| <i>tcdA</i> Reverse | TATCAGCCCATTGTTTTATGTATTC              | qPCR              | (2)        |
| <i>tcdA</i> probe   | FAM-TCACTGACTTCTCCACCTATCCATACAA-BHQ-1 | qPCR              | (2)        |
| oDB0117             | ACTCAAAGCGCAATAAATCTAGGAGC             | qPCR              | This study |
| oDB0118             | ACTGGTCTAGGTTTTGGCTCAACTTGT            | qPCR              | This study |

#### Reference List

1. **Fagan, R. P. and N. F. Fairweather.** 2011. Clostridium difficile has two parallel and essential Sec secretion systems. J.Biol.Chem. **286**:27483-27493.
2. **Bakker, D., W. K. Smits, E. J. Kuijper, and J. Corver.** 2012. TcdC Does Not Significantly Repress Toxin Expression in Clostridium difficile 630DeltaErm. PLoS.One. **7**:e43247.
