# Supplementary material
Source: PubMed Central journal article supplement (PMC4187886)

## Supplemental Figure 1

### Southern blot analysis of *C. difficile* wild type and $\Delta htrA$ .

Chromosomal DNA digested with HindIII was hybridized with an *ermB* specific probe.

For details: see Materials and Methods. Wild type is WKS1241,  $\Delta htrA$  is DB0002.

Note that wild type shows a single band, indicative of the *ermB* element that is still present in this strain (~7kb HindIII fragment, Hussain *et al* 2005).  $\Delta htrA$  contains an additional element (~3kb HindIII fragment). pMTL007 is shown as a positive control.

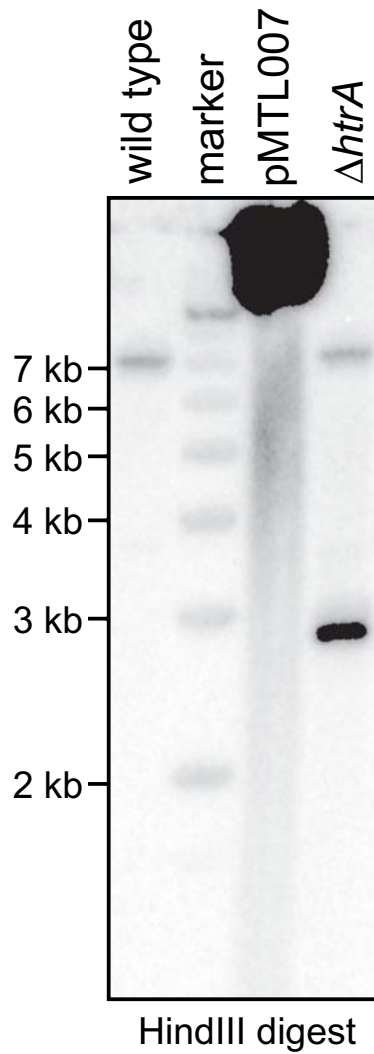

Supplement: IAI.02336-14_zii999090881so2.pdf [file IAI.02336-14_zii999090881so2.pdf]
