# Supplementary material
Source: PubMed Central journal article supplement (PMC4187886)
Supplement: IAI.02336-14_zii999090881so3.pdf [file IAI.02336-14_zii999090881so3.pdf]

Fig. S2

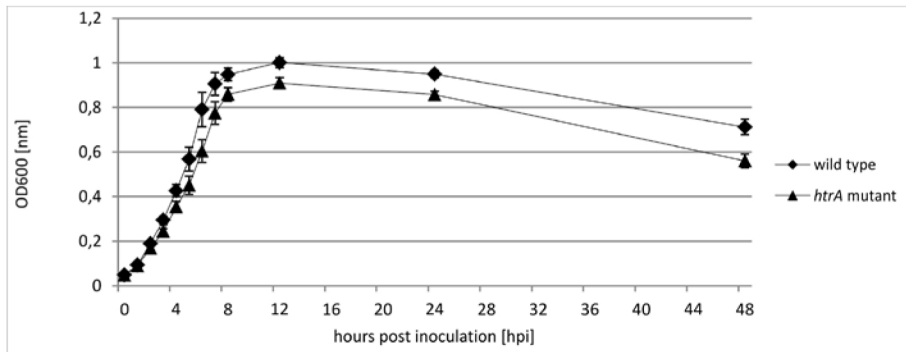

Supplemental figure 2: Growth curves of the wild type and the *htrA* mutant strain. The absorbance (OD600) was measured over 48 hours of growth in TTY medium. The error bars indicated the standard error of the mean of three experiments.
